# Supplementary material for: Transcriptome analyses reveal genotype- and developmental stage-specific molecular responses to drought and salinity stresses in chickpea
Source: PubMed Central journal article supplement (PMC4725360; doi:10.1038/srep19228), 2016-01-13
Supplement: srep19228-s1.pdf [file srep19228-s1.pdf]

## Supplementary information

# **Transcriptome analyses reveal genotype- and developmental stage-specific molecular responses to drought and salinity stresses in chickpea**

Rohini Garg<sup>1</sup>, Rama Shankar<sup>1</sup>, Bijal Thakkar<sup>1</sup>, Himabindu Kudapa<sup>2</sup>, Lakshmanan Krishnamurthy<sup>2</sup>, Nitin Mantri<sup>3</sup>, Rajeev K Varshney<sup>2</sup>, Sabhyata Bhatia<sup>1</sup>, Mukesh Jain<sup>1,4\*</sup>

<sup>1</sup>Functional and Applied Genomics Laboratory, National Institute of Plant Genome Research (NIPGR), ArunaAsaf Ali Marg, New Delhi, India

<sup>2</sup>International Crops Research Institute for theSemi-Arid Tropics (ICRISAT), Patancheru, Telangana, India

<sup>3</sup>School of Applied Sciences, RMIT University, Victoria, Australia

<sup>4</sup>School of Computational & Integrative Sciences, Jawaharlal Nehru University, New Delhi, India

**Supplementary Table S1** Summary of sequencing data generated, quality control and mapping on the genome.

| Sample name  | Genotype | Developmental stage | Condition - Replicate | Total reads | High quality reads | Mapped reads      |
|--------------|----------|---------------------|-----------------------|-------------|--------------------|-------------------|
| Dtol-ER-CT1  | ICC4958  | Early reproductive  | Control - Rep1        | 38946150    | 38357332           | 35132496 (91.59%) |
| Dtol-ER-DS1  | ICC4958  | Early reproductive  | Drought - Rep1        | 87316130    | 86128416           | 79489492 (92.29%) |
| Dsen-ER-CT1  | ICC1882  | Early reproductive  | Control - Rep1        | 90862998    | 89452802           | 80979543 (90.52%) |
| Dsen-ER-CT2  | ICC1882  | Early reproductive  | Control - Rep2        | 56065466    | 54772726           | 50162655 (91.58%) |
| Dsen-ER-DS1  | ICC1882  | Early reproductive  | Drought - Rep1        | 66818922    | 65500916           | 62049959 (94.73%) |
| Dsen-ER-DS2  | ICC1882  | Early reproductive  | Drought - Rep2        | 67541626    | 66626432           | 62518842 (93.83%) |
| Dtol-LR-CT1  | ICC4958  | Late reproductive   | Control - Rep1        | 53618608    | 49161672           | 46048054(93.66%)  |
| Dtol-LR-CT2  | ICC4958  | Late reproductive   | Control - Rep2        | 77754830    | 71956186           | 67094542(93.24%)  |
| Dtol-LR-DS1  | ICC4958  | Late reproductive   | Drought - Rep1        | 49525314    | 44765932           | 41118898(91.85%)  |
| Dtol-LR-DS2  | ICC4958  | Late reproductive   | Drought - Rep2        | 62321906    | 56257902           | 50593718(89.93%)  |
| Dsen-LR-CT1  | ICC1882  | Late reproductive   | Control - Rep1        | 72366358    | 67783068           | 64293762(94.85%)  |
| Dsen-LR-CT2  | ICC1882  | Late reproductive   | Control - Rep2        | 54605658    | 50106996           | 45508444(90.82%)  |
| Dsen-LR-DS1  | ICC1882  | Late reproductive   | Drought - Rep1        | 50837320    | 46399490           | 43714629(94.21%)  |
| Dsen-LR-DS2  | ICC1882  | Late reproductive   | Drought - Rep2        | 50934538    | 46921496           | 44210337(94.22%)  |
| Stol-Veg-CT1 | JG62     | Vegetative          | Control - Rep1        | 33828680    | 33268614           | 31723373 (95.35%) |
| Stol-Veg-CT2 | JG62     | Vegetative          | Control - Rep2        | 40052726    | 39596604           | 33985566 (85.82%) |
| Stol-Veg-SS1 | JG62     | Vegetative          | Salinity -Rep1        | 41280412    | 40823266           | 35693393 (87.43%) |
| Stol-Veg-SS2 | JG62     | Vegetative          | Salinity -Rep2        | 33665672    | 33046724           | 31259781 (94.59%) |
| Ssen-Veg-CT1 | ICCV2    | Vegetative          | Control - Rep1        | 34060046    | 33544722           | 31148113 (92.85%) |
| Ssen-Veg-CT2 | ICCV2    | Vegetative          | Control - Rep2        | 32694562    | 31906180           | 30280027 (94.90%) |
| Ssen-Veg-SS1 | ICCV2    | Vegetative          | Salinity -Rep1        | 32702022    | 32176314           | 30383497 (94.42%) |
| Ssen-Veg-SS2 | ICCV2    | Vegetative          | Salinity -Rep2        | 33709024    | 32875038           | 26330836 (80.09%) |
| Stol-LR-CT1  | JG62     | Late reproductive   | Control - Rep1        | 53802474    | 44144472           | 40383552(91.48%)  |
| Stol-LR-CT2  | JG62     | Late reproductive   | Control - Rep2        | 43672212    | 36478766           | 33420893(91.61%)  |
| Stol-LR-SS1  | JG62     | Late reproductive   | Salinity -Rep1        | 34373030    | 30962394           | 28850367 (93.17%) |
| Stol-LR-SS2  | JG62     | Late reproductive   | Salinity -Rep2        | 48326362    | 39824296           | 35768344(89.81%)  |
| Ssen-LR-CT1  | ICCV2    | Late reproductive   | Control - Rep1        | 43921582    | 38496050           | 35515817(92.25%)  |

|             |       |                   |                |          |          |                  |
|-------------|-------|-------------------|----------------|----------|----------|------------------|
| Ssen-LR-CT2 | ICCV2 | Late reproductive | Control - Rep2 | 46497994 | 41874556 | 37609076(89.81%) |
| Ssen-LR-SS1 | ICCV2 | Late reproductive | Salinity -Rep1 | 40374538 | 34562396 | 31796256(91.99%) |
| Ssen-LR-SS2 | ICCV2 | Late reproductive | Salinity -Rep2 | 41832144 | 36349044 | 33460675(92.05%) |

**Supplementary Table S2.** List of primers sequences used for real time PCR analysis.

| <b>Gene ID</b> | <b>Primer sequence</b>       |
|----------------|------------------------------|
| Ca_02451       | GATTCAACCAAAGAGACTCCAACA     |
|                | GATAACCCTTTTGTAGCTTTTATTGTCA |
| Ca_23716       | TGAAAATGATGCTGTGAGTACTAGGA   |
|                | TGTCCCAGAAGATACCAGAGGAAT     |
| Ca_08236       | CTGATGCACCAGCTCCAAGTC        |
|                | GAGAAGCAAAAGCAGTTGGAACA      |
| Ca_03790       | GCTGAGATTTTTGAGGCGGTTA       |
|                | AGATCGGAAGATTCTGGATGGA       |
| Ca_14421       | CGAACGACCACATCGGAATC         |
|                | GGCTCCGGTAAGTGATGTAGGT       |
| Ca_05907       | TCGCACAAATCCAACCATACA        |
|                | CGCCGTTGAATCGCTCAT           |
| Ca_11127       | GCCACCGCTTGTGATCGT           |
|                | GAGCAGAACTTTGGAGAAATAGGAA    |
| Ca_16693       | AAAGAACGAGGACCCGTGATAA       |
|                | GCAGGAGGAATACCCGACAA         |
| Ca_24924       | TGATGATGTTGATTACCTTGTTGTTG   |
|                | TCTCTCCAATTCCCTTAGCAGCAT     |

**Supplementary Fig. S1** Venn diagrams showing overlap between the number of genes differentially expressed in the chickpea roots at the seedling (previous study) and ER/LR/Veg stages (present study) under drought (a,b) and salinity (c,d) stress. Root-DS and Root-SS represent number of differentially expressed genes in the roots of chickpea seedlings under drought and salinity stress, respectively (from Garg et al., 2015, Plant Mol Biol Rep). The number of unique gene loci showing differential expression in the roots at ER/LR/Veg stage under drought/salinity stress for other samples from the present study are represented.

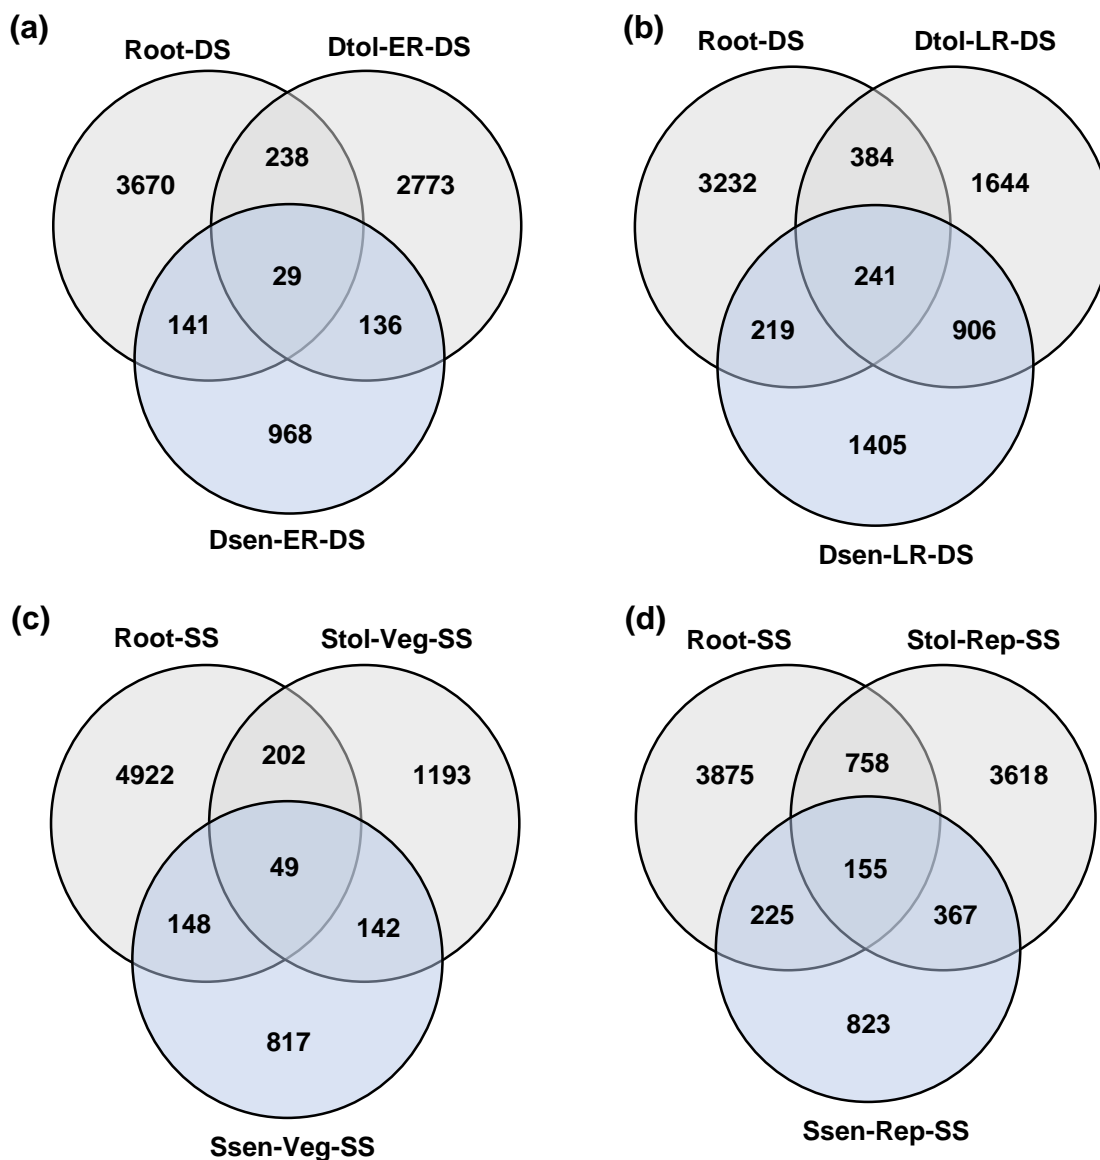

**Supplementary Fig. S2** Heatmaps showing the differential expression of transcripts involved in stomatal regulation (a) and ion homeostasis (b). Color scale showing differential expression ( $\log_2$  fold change) is shown at the bottom. The related biological process GO terms are shown on the right side.

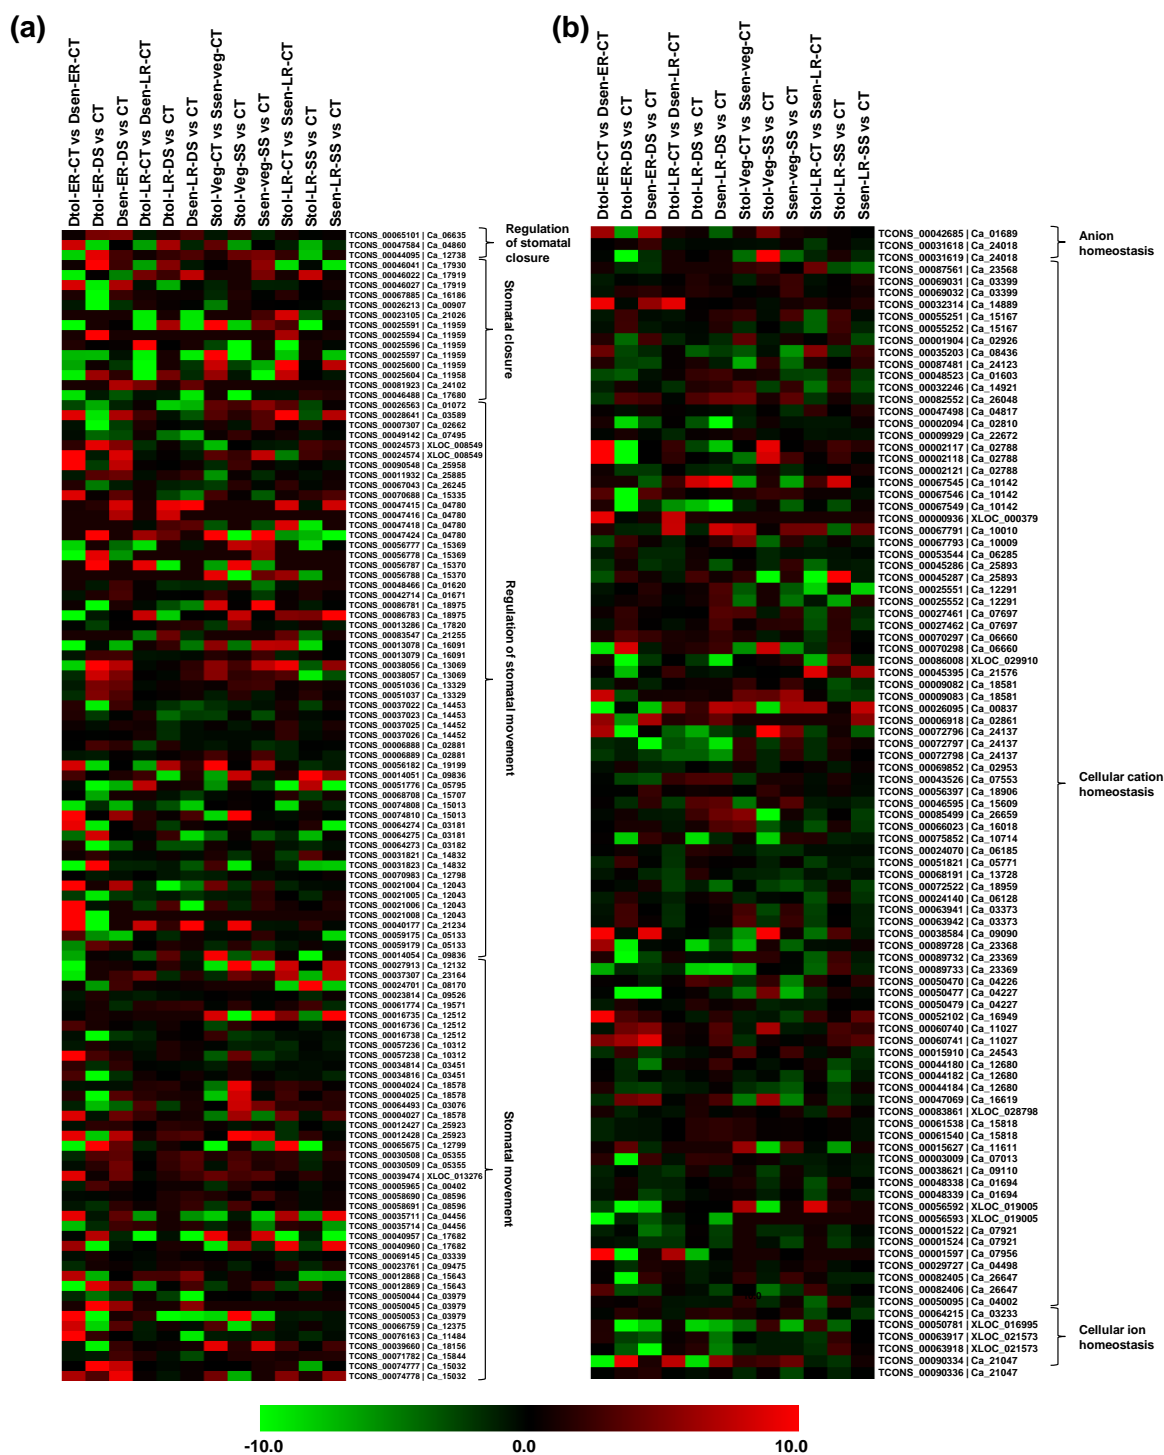

**Supplementary Fig. S3** Quantitative real-time PCR analysis to validate the results of RNA-seq. The bar graph shows relative transcript abundance of different chickpea genes in different comparisons (labeled below the lower panel) obtained via RT-qPCR and RNA-seq analyses. ‘r’ represents correlation coefficient between RNA-seq and RT-qPCR data.

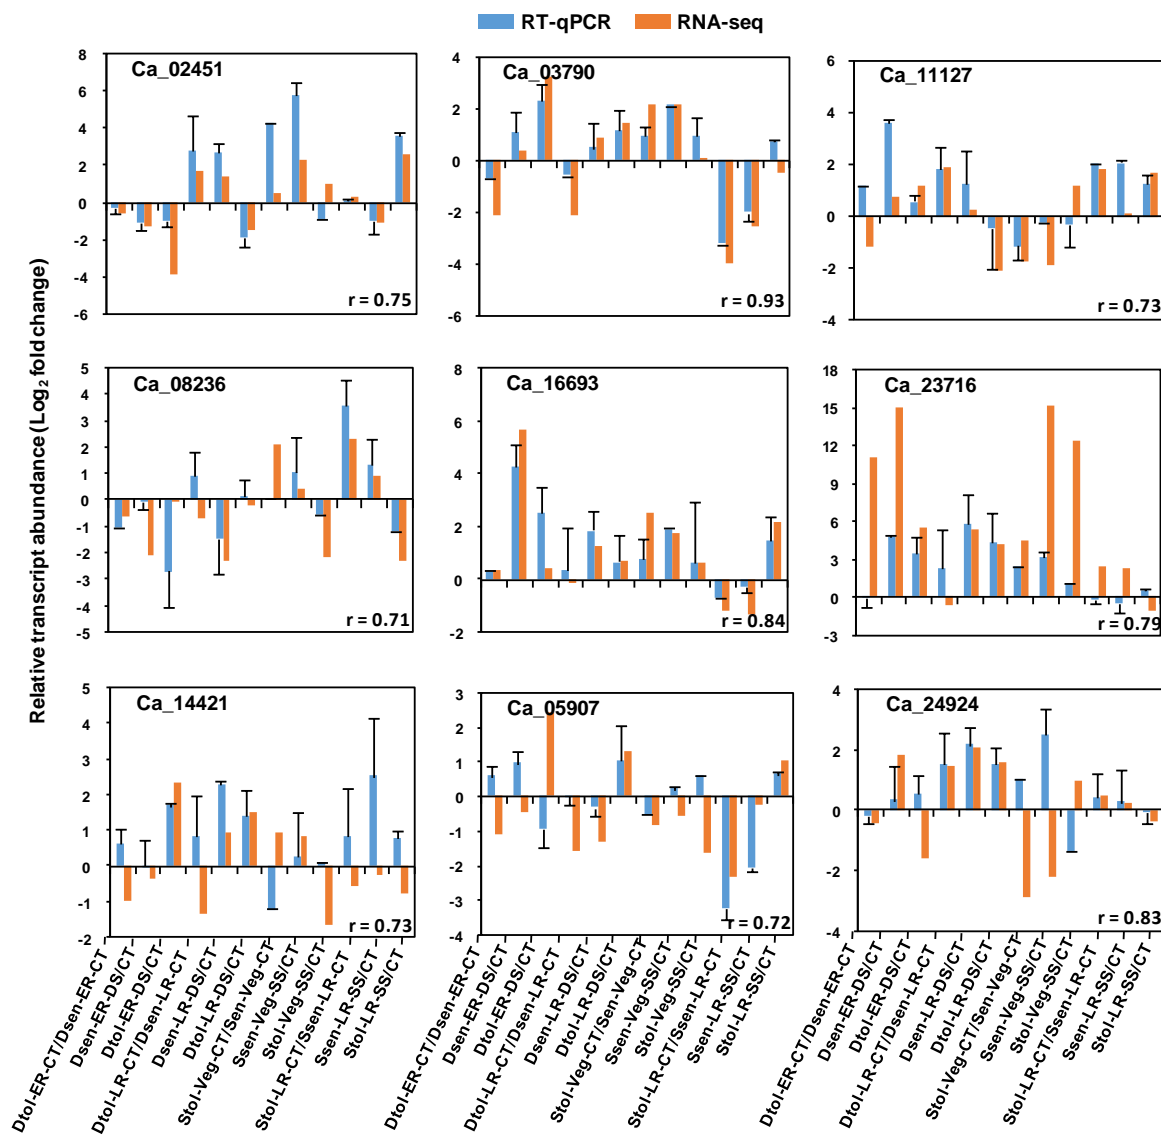

**Supplementary Fig. S4** Number of transcripts and gene loci representing AP2-EREBP family members showing differential expression under different conditions.

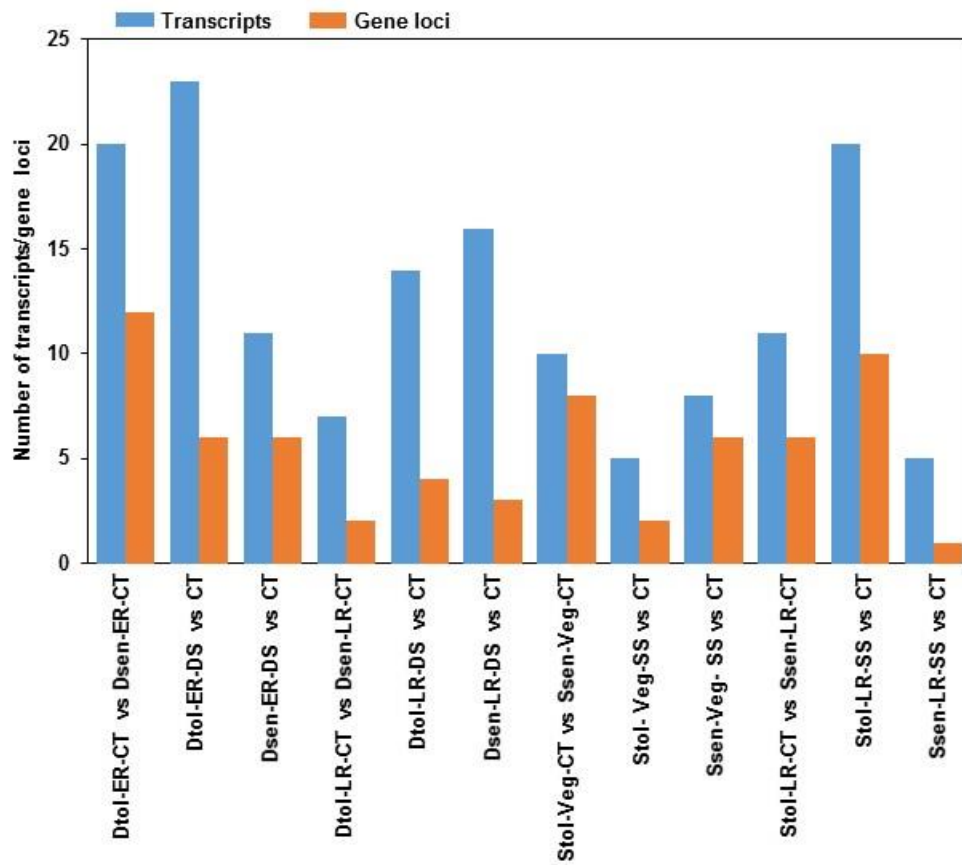



**Supplementary Fig. S5** Metabolic pathway overview of the differentially expressed transcripts in drought related cultivars obtained from MapMan analysis. The differential expression of genes involved in different metabolic pathways is shown in the form of heatmaps. Color scale showing fold change is shown at the bottom. Metabolic pathways are represented in different shapes of grey color.

**Dsen-ER-DS/CT**

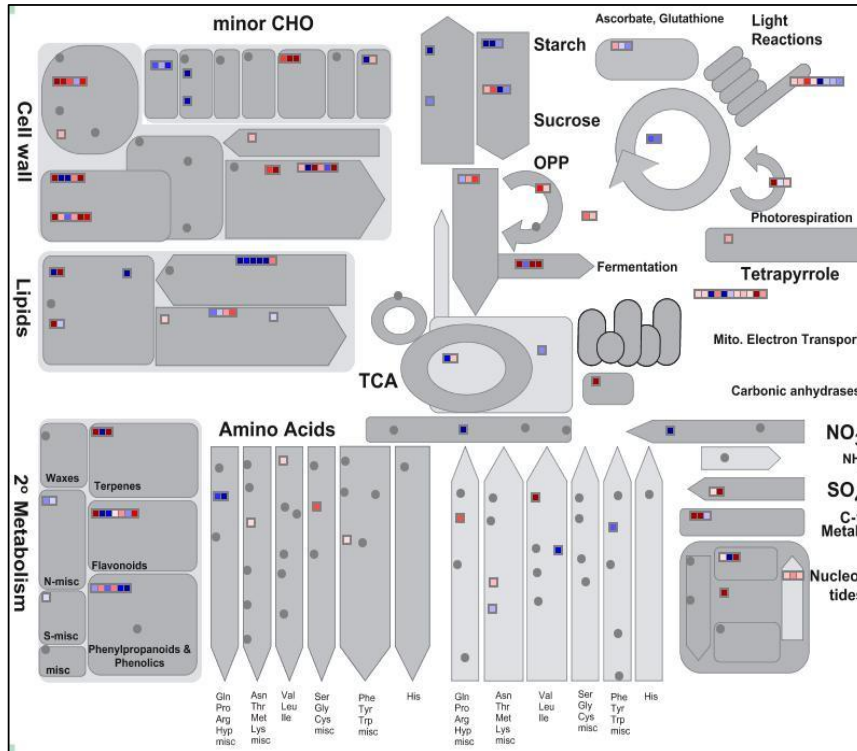

**Dsen-LR-DS/CT**

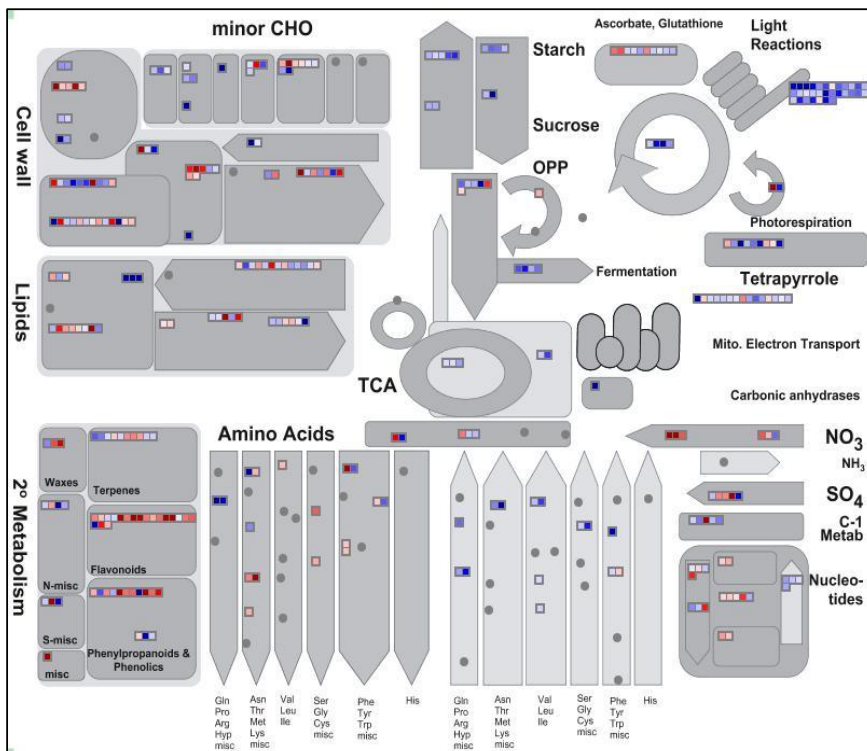

Dtol-ER-DS/CT

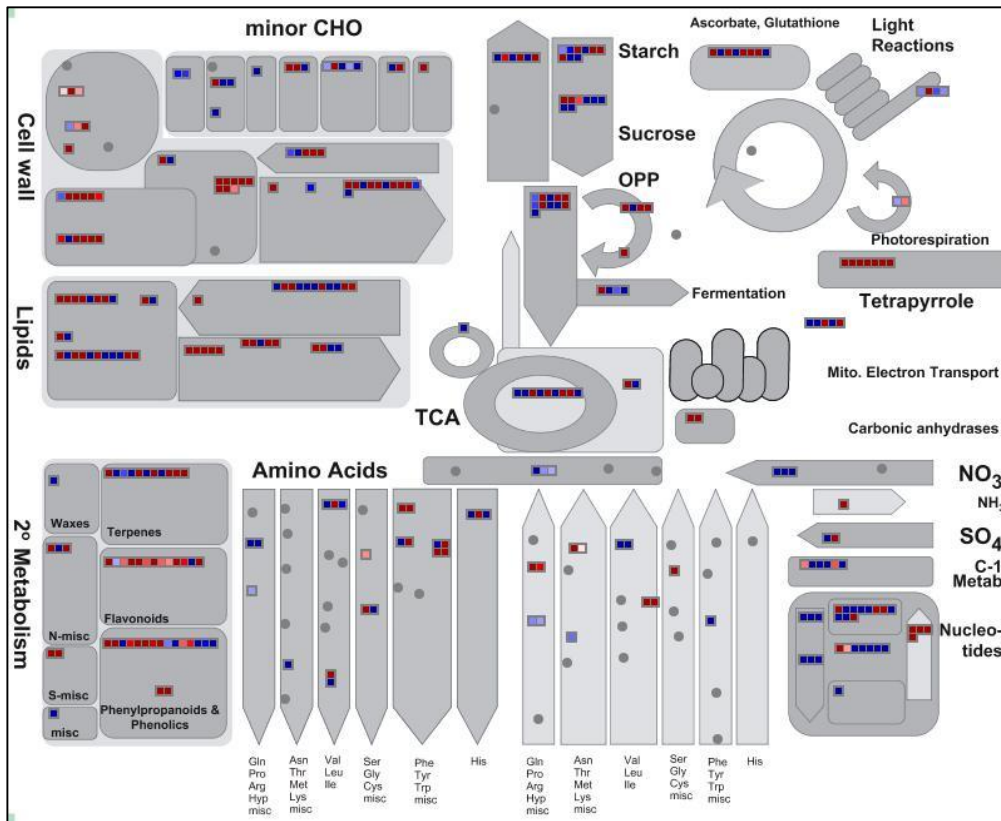

Dtol-LR-DS/CT

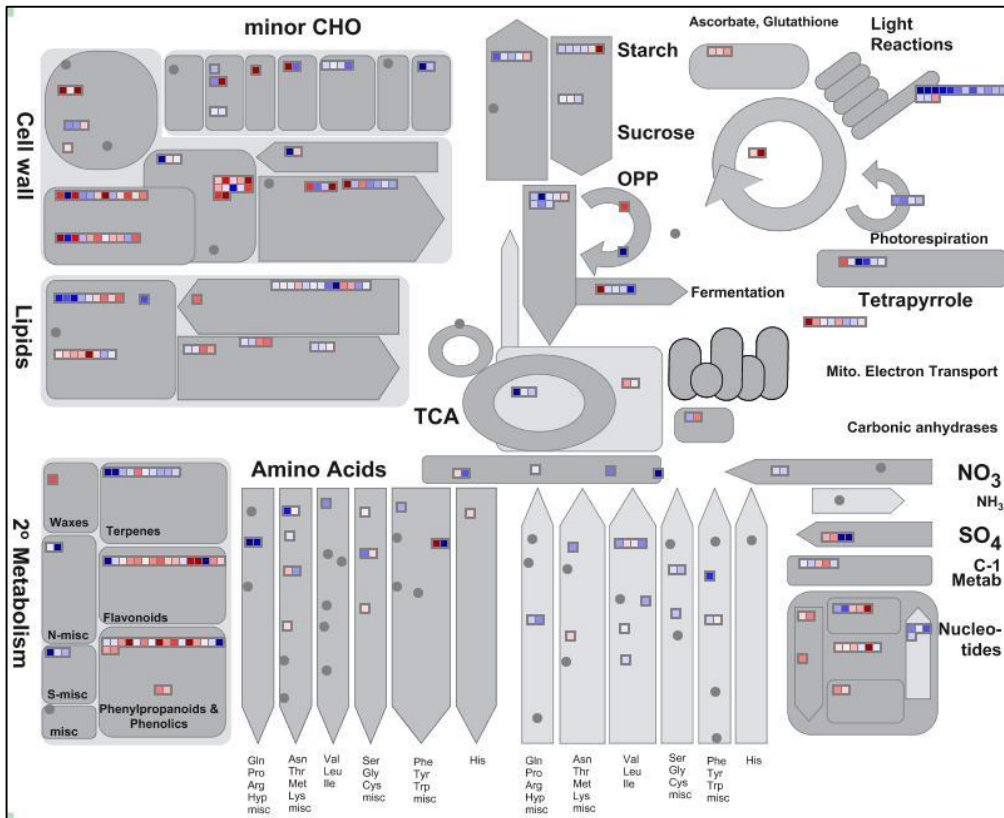

Dtol-ER-CT/Dsen-ER-CT

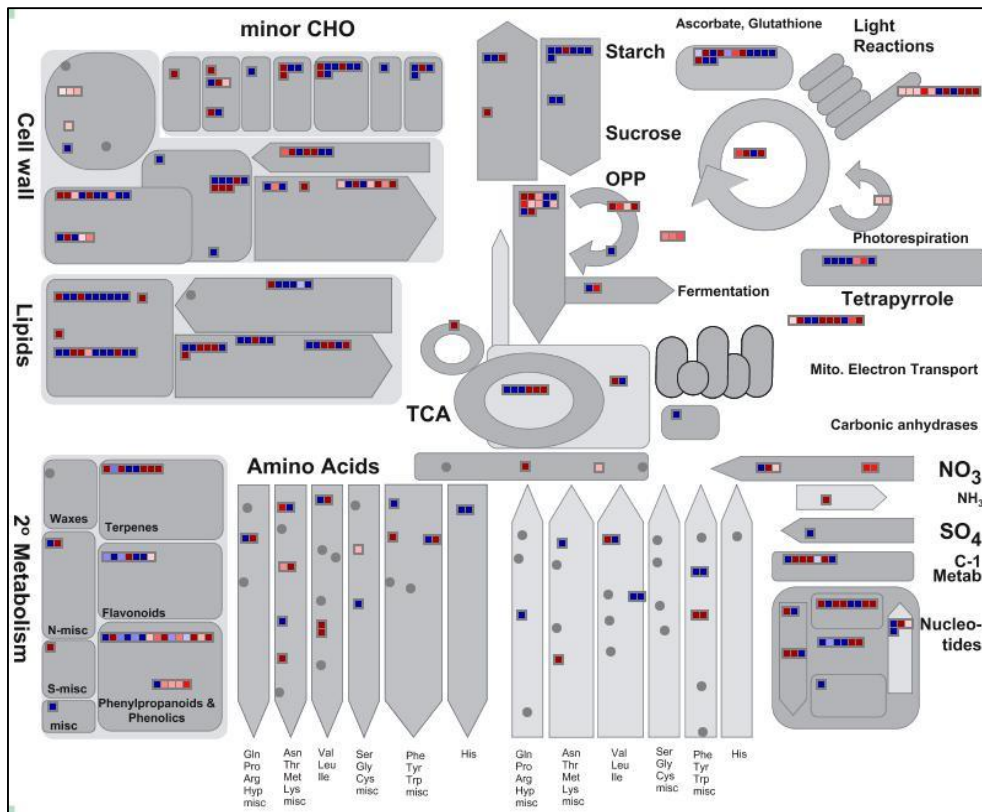

Dtol-LR-CT/ Dsen-LR-CT

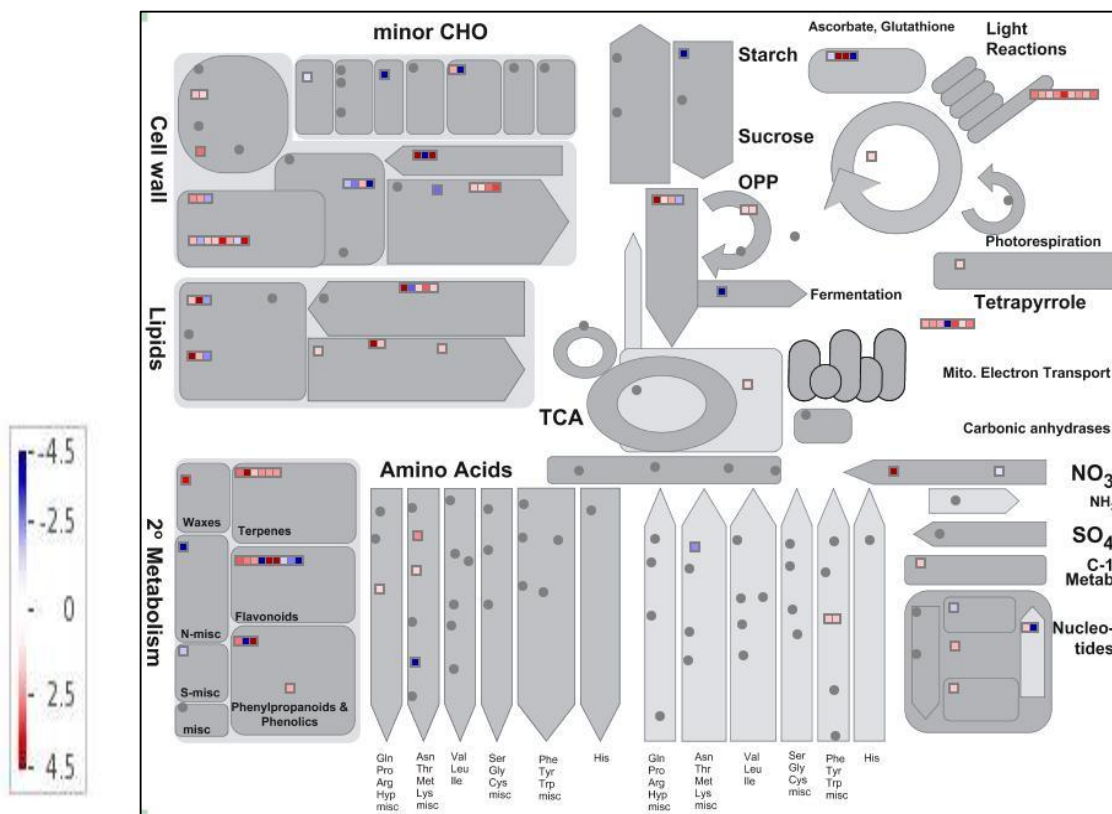

**Supplementary Fig. S6** Metabolic pathway overview of the differentially expressed transcripts in salinity related cultivars obtained from MapMan analysis. The differential expression of genes involved in different metabolic pathways is shown in the form of heatmaps. Color scale showing fold change is shown at the bottom. Metabolic pathways are represented in different shapes of grey color.

**Ssen-Veg-SS/CT**

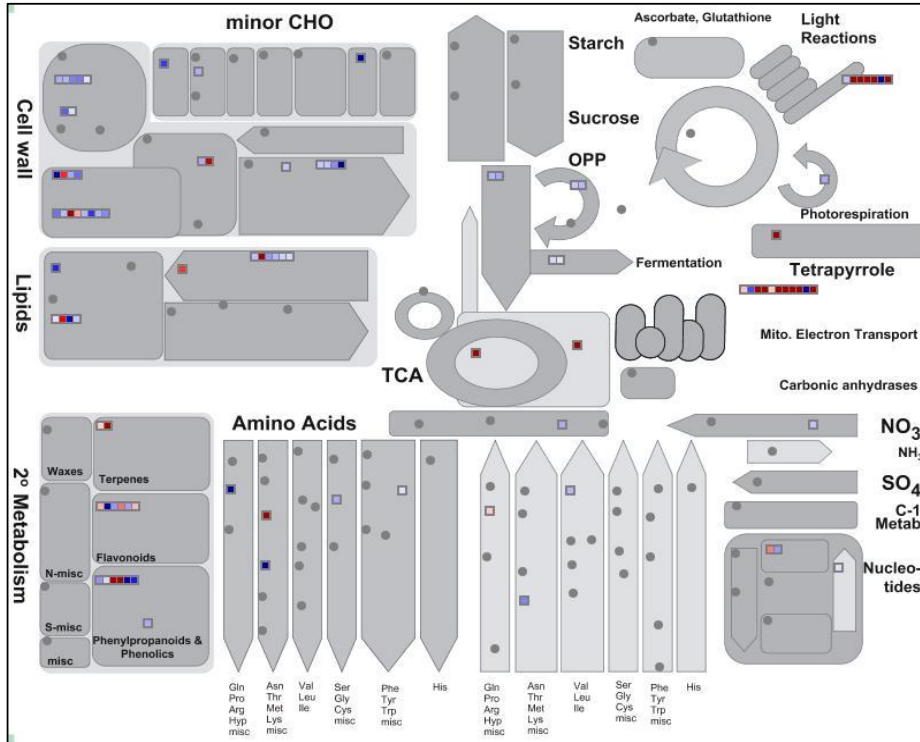

**Ssen-LR-SS/CT**

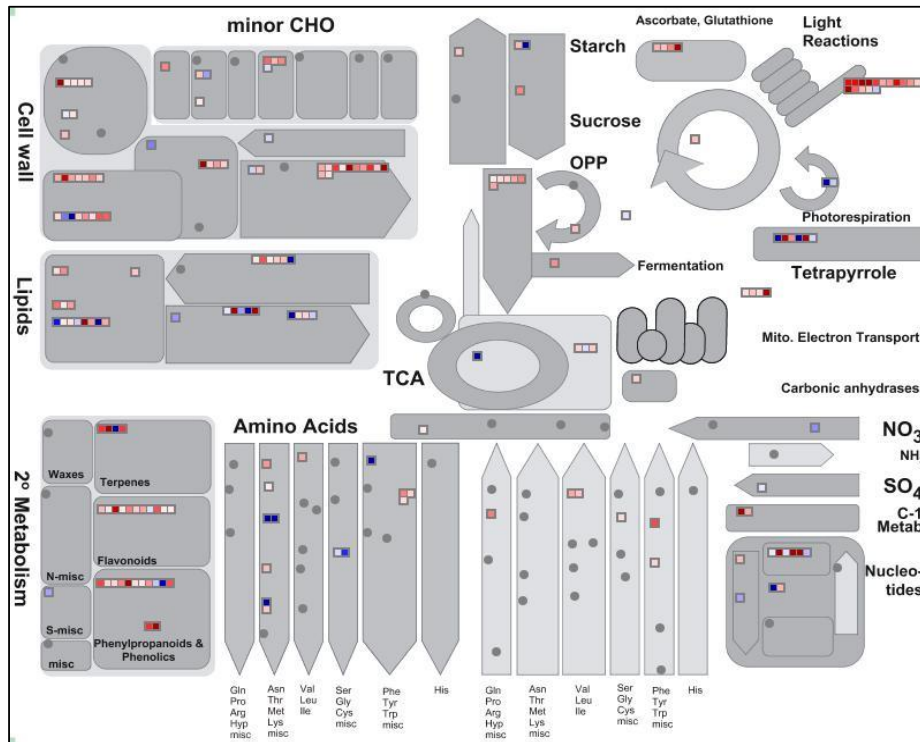

### Stol-Veg-SS/CT

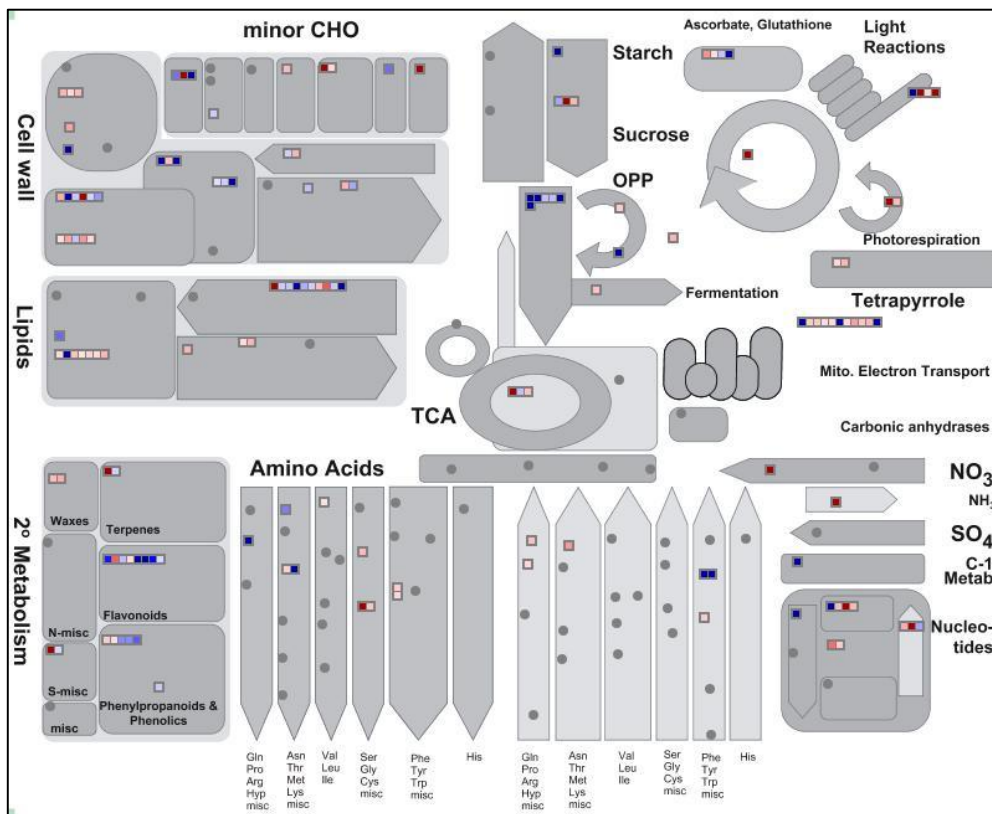

### Stol-LR-SS/CT

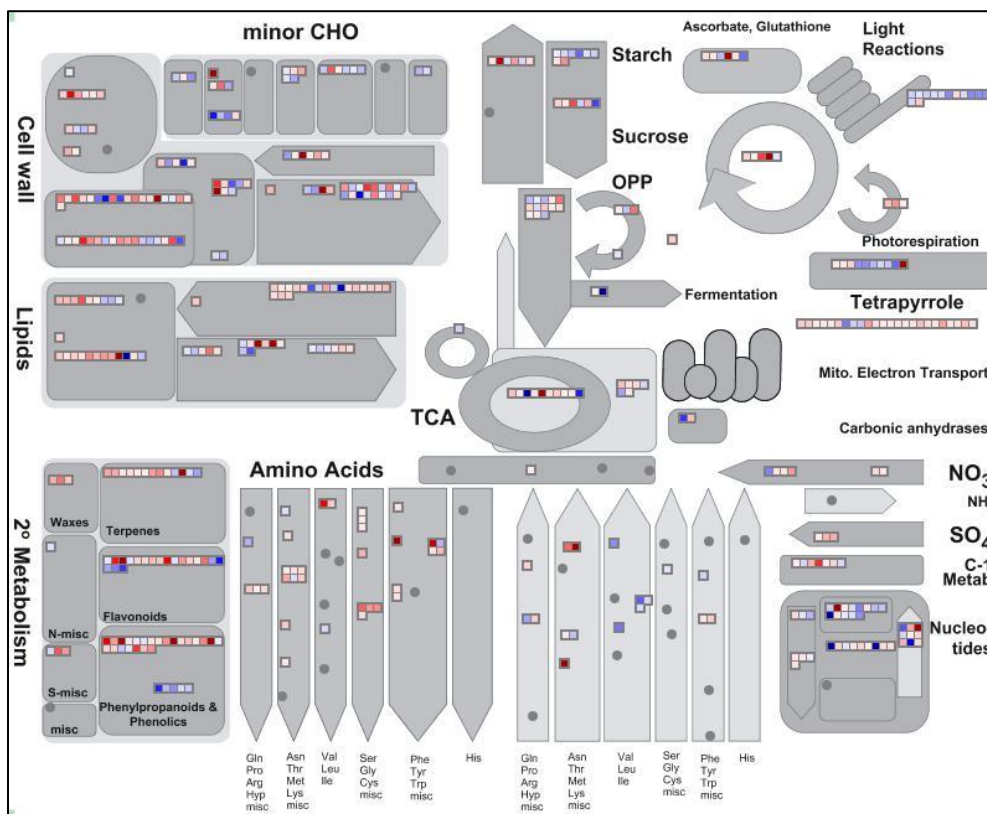

Stol-Veg-CT/Ssen-Veg-CT

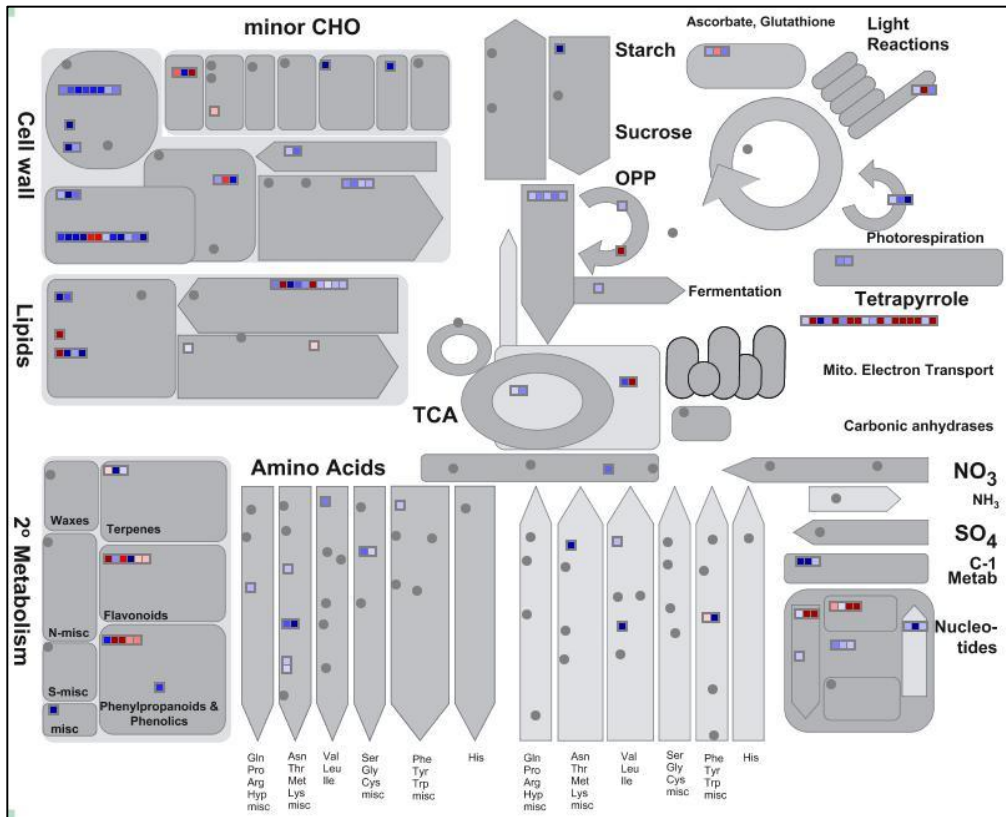

Stol-LR-CT/ Ssen-LR-CT

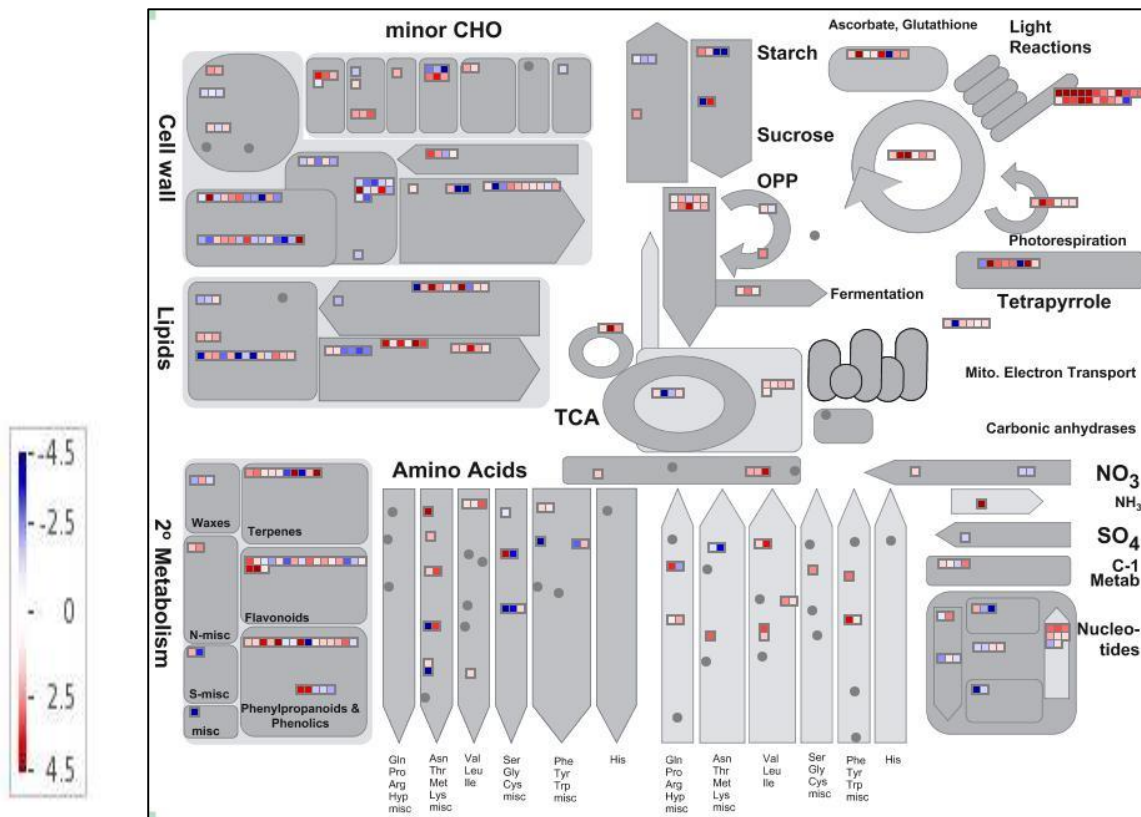

**Supplementary Fig. S7** Biotic stress pathway overview of the differentially expressed transcripts in drought-tolerant cultivars obtained from MapMan analysis. The differential expression of genes involved in different biotic stress related pathways is shown in the form of heatmaps. Color scale showing differential expression is shown at the top left.

**Dtol-ER-CT/Dsen-ER-CT**

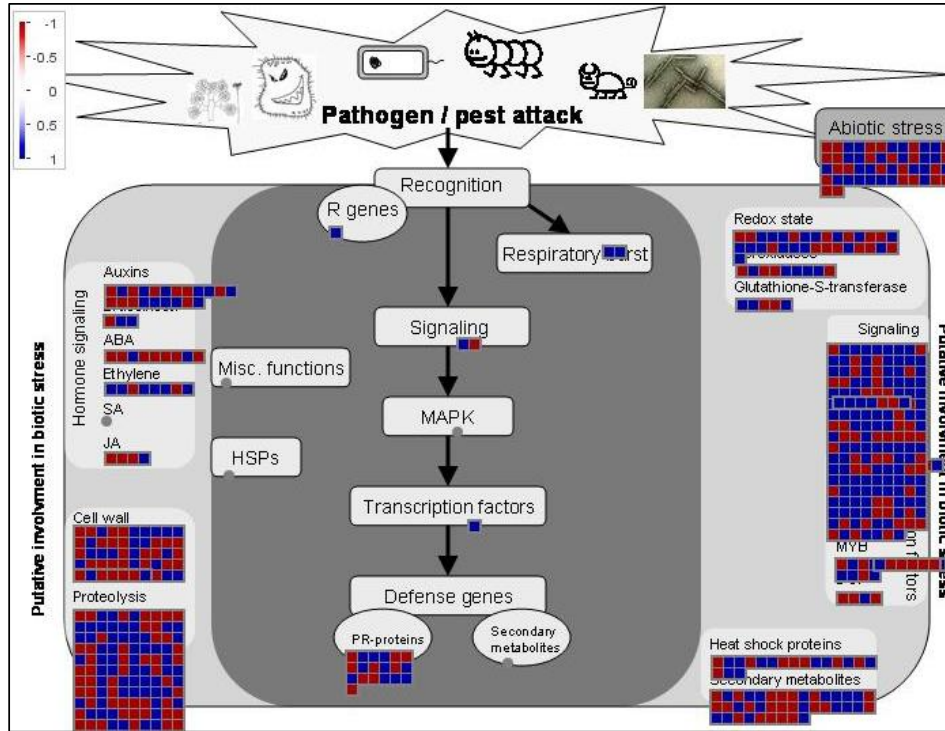

**Dtol-ER-DS/CT**

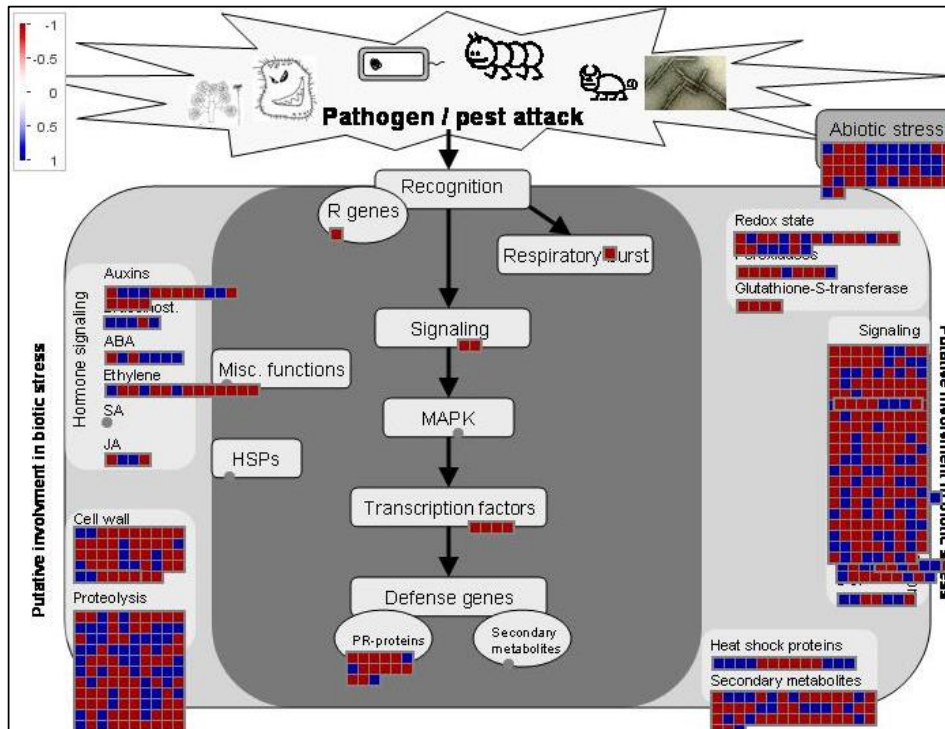

The above images are the output from the MapMan software. The pathogen/pest images and pathways represented are the standard output of the MapMan for biotic stress pathway and heatmaps are drawn by the MapMan software according to the differentially expressed transcripts involved in these pathways.

**Supplemental Fig. S8** Biotic stress pathway overview of the differentially expressed transcripts in salinity-tolerant cultivars obtained from MapMan analysis. The differential expression of genes involved in different biotic stress related pathways is shown in the form of heatmaps. Color scale showing differential expression is shown at the top left.

**Stol-LR-CT/ Ssen-LR-CT**

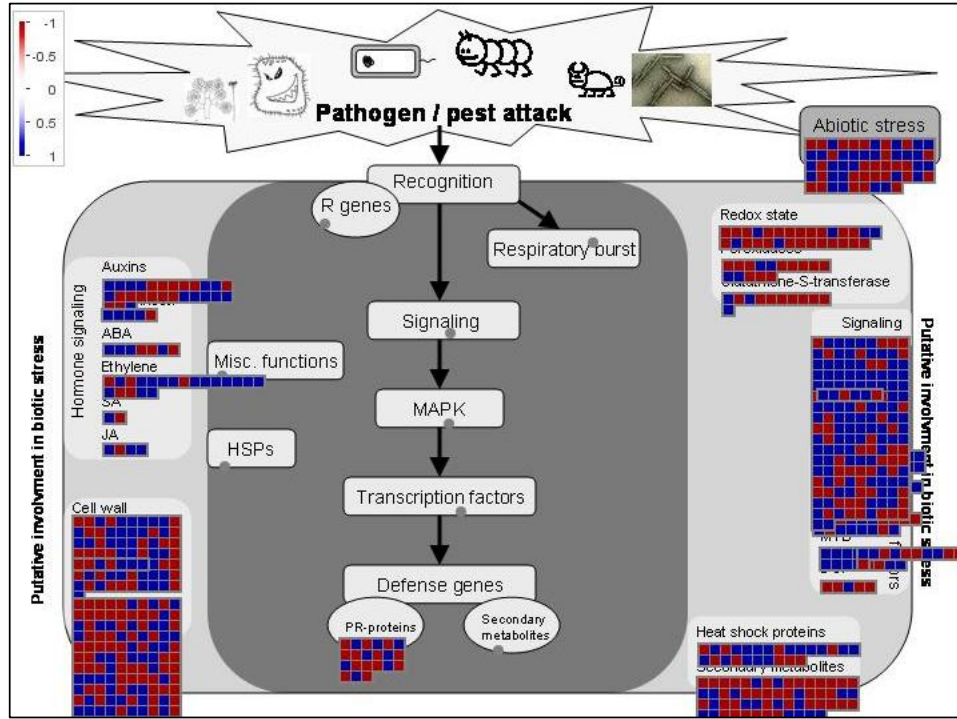

**Stol-LR-SS/CT**

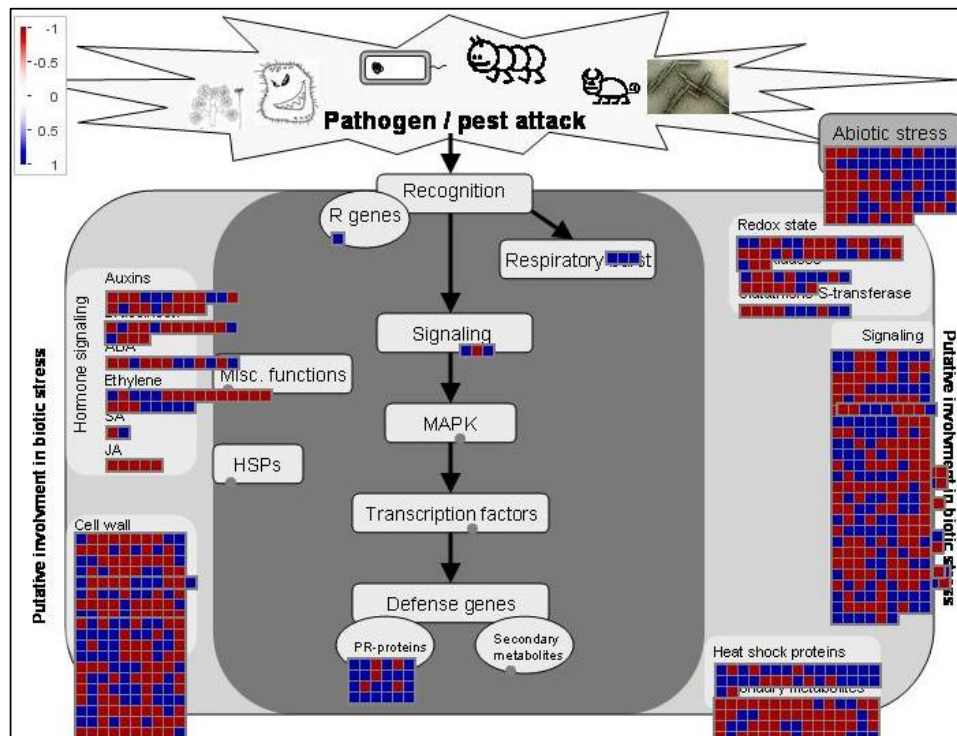

The above images are the output from the MapMan software. The pathogen/pest images and pathways represented are the standard output of the MapMan for biotic stress pathway and heatmaps are drawn by the MapMan software according to the differentially expressed transcripts involved in these pathways.
